# Supplementary material for: Modulation of the intestinal microbiota of broilers supplemented with monensin or functional oils in response to challenge by Eimeria spp
Source: PubMed Central journal article supplement (PMC7413546; doi:10.1371/journal.pone.0237118), 2020-08-07

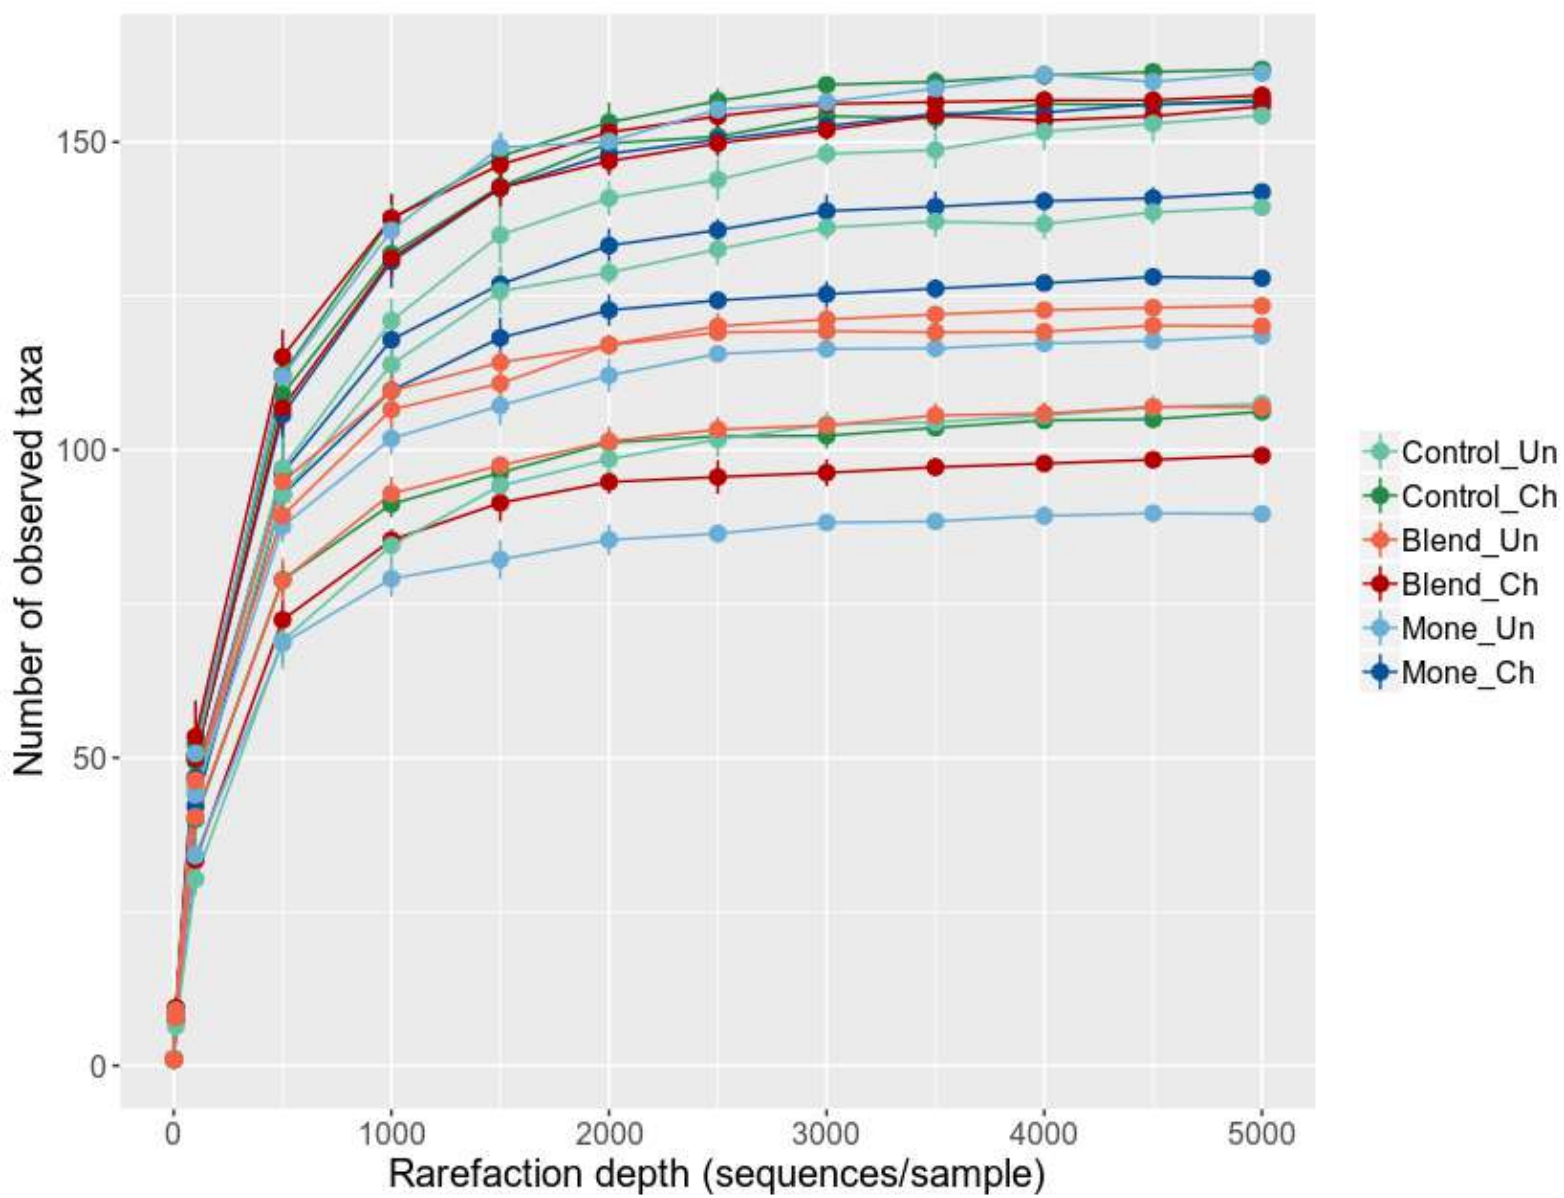

Supplement: pone.0237118.s001.pdf [file pone.0237118.s001.pdf]
